# Supplementary material
Source: PubMed Central journal article supplement (PMC5910006)

SUPPLEMENTARY DATA

**Supplementary Table 1. Characteristics of mothers and offspring of Thai, Afro-Caribbean and Mexican-American ancestry with maternal FPG value, genetic data and offspring birth weight in HAPO.**

|                                                                                  | Thai        | Afro-Caribbean | Mexican-American |
|----------------------------------------------------------------------------------|-------------|----------------|------------------|
| Total mothers, n                                                                 | 1168        | 1072           | 602              |
| Age in years, mean (SD)                                                          | 27.7 (5.5)  | 25.6 (5.6)     | 28.8 (5.6)       |
| Primiparous, n (%)                                                               | 630 (54.1%) | 492 (45.9%)    | 160 (26.6%)      |
| Pre-pregnancy BMI, mean (SD)                                                     | 21.8 (3.5)  | 24.2 (5.6)     | 26.8 (5.6)       |
| Smoker, n (%)                                                                    | 8 (0.007%)  | 5 (0.005%)     | 0 (0.0%)         |
| Total offspring, n                                                               | 1168        | 1072           | 602              |
| Gestational age at delivery in weeks, mean (SD)                                  | 39 (1)      | 40 (1)         | 40 (1)           |
| Female offspring, n (%)                                                          | 599 (51.3%) | 518 (48.3%)    | 309 (51.3%)      |
| Offspring birth weight corrected for sex and gestational age in grams, mean (SD) | 3092 (364)  | 3223 (427)     | 3436 (400)       |
| Corrected birth weight cut-off for LGA ( $\geq 90^{\text{th}}$ centile) in grams | 3645        | 3730           | 3960             |

BMI, body mass index; FPG, fasting plasma glucose; HAPO, Hyperglycemia and Adverse Pregnancy Outcome Study; LGA, large for gestational age, SD, standard deviation

**Supplementary Table 2. Pairwise correlations of effect allele frequencies of 59 SNPs in the HAPO study samples**

|            | Eur    | Thai   | Afro-Carib | Mex-Amer |
|------------|--------|--------|------------|----------|
| Eur        | 1.0000 | -      | -          | -        |
| Thai       | 0.8155 | 1.0000 | -          | -        |
| Afro-Carib | 0.7610 | 0.8009 | 1.0000     | -        |
| Mex-Amer   | 0.9263 | 0.8869 | 0.8218     | 1.0000   |

SUPPLEMENTARY DATA

**Supplementary Table 3. SNPs shown to be associated with birth weight (Horikoshi et al. 2016, *Nature* 538:248-252) and included in the fetal genetic score for birth weight. Beta values were aligned to the birth weight-raising allele on the + strand.**

| SNP         | Gene               | Alleles (Effect/Other) | Beta  |
|-------------|--------------------|------------------------|-------|
| rs2473248   | <i>WNT4-ZBTB40</i> | C/T                    | 0.033 |
| rs3753639   | <i>ZBTB7B</i>      | C/T                    | 0.031 |
| rs72480273  | <i>FCGR2B</i>      | C/A                    | 0.031 |
| rs61830764  | near <i>DTL</i>    | A/G                    | 0.022 |
| rs7575873   | <i>ATAD2B</i>      | A/G                    | 0.038 |
| rs1374204   | <i>EPAS1</i>       | T/C                    | 0.047 |
| rs2242116   | <i>PTH1R</i>       | A/G                    | 0.022 |
| rs11719201  | <i>ADCY5</i>       | T/C                    | 0.046 |
| rs10935733  | <i>CPA3</i>        | T/C                    | 0.022 |
| rs13322435  | <i>CCNL1</i>       | A/G                    | 0.053 |
| rs925098    | <i>LCORL</i>       | G/A                    | 0.034 |
| rs6537307   | <i>HHIP</i>        | G/A                    | 0.025 |
| rs854037    | <i>5q11.2</i>      | A/G                    | 0.027 |
| rs7729301   | <i>EBF1</i>        | A/G                    | 0.024 |
| rs35261542  | <i>CDKAL1</i>      | C/A                    | 0.044 |
| rs9379832   | <i>HIST1H2BE</i>   | A/G                    | 0.023 |
| rs7742369   | <i>HMGA1</i>       | G/A                    | 0.028 |
| rs1415701   | <i>L3MBTL3</i>     | G/A                    | 0.025 |
| rs1101081   | <i>ESR1</i>        | C/T                    | 0.038 |
| rs798489    | <i>GNA12</i>       | C/T                    | 0.023 |
| rs11765649  | <i>IGF2BP3</i>     | T/C                    | 0.027 |
| rs6959887   | <i>TBX20</i>       | A/G                    | 0.023 |
| rs138715366 | <i>YKT6-GCK</i>    | C/T                    | 0.241 |
| rs62466330  | <i>BCL7B</i>       | C/T                    | 0.049 |
| rs13266210  | <i>ANK1-NKX6-3</i> | A/G                    | 0.031 |
| rs6989280   | <i>TRIB1</i>       | G/A                    | 0.022 |
| rs12543725  | <i>SLC45A4</i>     | G/A                    | 0.023 |
| rs28510415  | <i>PTCH1</i>       | G/A                    | 0.056 |
| rs2150052   | <i>LPAR1</i>       | T/A                    | 0.021 |
| rs7847628   | <i>PHF19</i>       | G/A                    | 0.023 |
| rs700059    | <i>STRBP</i>       | G/A                    | 0.033 |
| rs61862780  | <i>HHEX-IDE</i>    | T/C                    | 0.028 |
| rs74233809  | <i>NT5C2</i>       | C/T                    | 0.037 |
| rs7076938   | <i>ADRB1</i>       | T/C                    | 0.036 |
| rs2421016   | <i>PLEKHA1</i>     | T/C                    | 0.021 |
| rs72851023  | <i>INS-IGF2</i>    | T/C                    | 0.048 |
| rs10830963  | <i>MTNR1B</i>      | G/C                    | 0.023 |
| rs11055034  | <i>APOLD1</i>      | C/A                    | 0.022 |
| rs139975827 | <i>ABCC9</i>       | G/A                    | 0.025 |

SUPPLEMENTARY DATA

|             |                           |     |       |
|-------------|---------------------------|-----|-------|
| rs12823128  | <i>ITPR2</i>              | T/C | 0.021 |
| rs1351394   | <i>HMGA2</i>              | T/C | 0.044 |
| rs7964361   | <i>IGF1</i>               | A/G | 0.039 |
| rs2324499   | <i>LINC00332</i>          | G/C | 0.022 |
| rs2854355   | <i>RBI</i>                | G/A | 0.023 |
| rs1819436   | <i>RNF219-AS1</i>         | C/T | 0.033 |
| rs12906125  | <i>FES</i>                | G/A | 0.023 |
| rs7402982   | <i>IGF1R</i>              | A/G | 0.023 |
| rs1011939   | <i>GPR139</i>             | G/A | 0.022 |
| rs113086489 | <i>CLDN7</i>              | T/C | 0.031 |
| rs144843919 | <i>SUZ12P1-CRLF3</i>      | G/A | 0.066 |
| rs12942207  | <i>SP6-SP2</i>            | C/T | 0.022 |
| rs61154119  | <i>ACTL9/LOC105372267</i> | T/G | 0.028 |
| rs10402712  | <i>PEPD</i>               | A/G | 0.022 |
| rs6040076   | <i>JAG1</i>               | C/G | 0.023 |
| rs28530618  | <i>C20orf203</i>          | A/G | 0.026 |
| rs6016377   | <i>MAFB</i>               | T/C | 0.024 |
| rs2229742   | <i>NRIP1</i>              | G/C | 0.036 |
| rs134594    | <i>KREMEN1</i>            | C/T | 0.023 |
| rs62240962  | <i>SREBF2</i>             | C/T | 0.047 |
| rs11096402  | <i>PLAC1</i>              | G/A | 0.028 |

SUPPLEMENTARY DATA

**Supplementary Table 4. Associations between maternal FPG, fetal genetic score for birth weight and corrected birth weight for participants of European ancestry in EFSOCH and HAPO.** Range of maternal FPG for each tertile; lowest 3.2-4.3 mmol/L, middle 4.4-4.6 mmol/L, highest 4.6-6.7 mmol/L.

| <b>European ancestry<br/>(n=2,051)</b>                               | <b>Beta coefficient<br/>(<math>\beta</math>)</b> | <b>95% CI</b>                                | <b>P value</b>         | <b>Adjusted<br/>R<sup>2</sup></b> |
|----------------------------------------------------------------------|--------------------------------------------------|----------------------------------------------|------------------------|-----------------------------------|
| <b>Corrected birth weight and maternal FPG as continuous measure</b> | 301 grams per mmol/L                             | 250-353 grams per mmol/L                     | $5.0 \times 10^{-31*}$ | 0.07                              |
| <b>Corrected birth weight and maternal FPG as ascending tertiles</b> | 112 grams per one FPG tertile higher             | 88-135 grams per one FPG tertile higher      | $1.8 \times 10^{-10*}$ | 0.04                              |
| <b>Corrected birth weight and fetal GS as continuous measure</b>     | 18 grams per one fetal GS unit                   | 13-23 grams per one fetal GS unit            | $6.3 \times 10^{-14*}$ | 0.03                              |
| <b>Corrected birth weight and fetal GS as ascending tertiles</b>     | 87 grams per one fetal GS tertile higher         | 63-111 grams per one fetal GS tertile higher | $9.5 \times 10^{-13*}$ | 0.02                              |
| <b>Maternal FPG and fetal GS as continuous measures</b>              | 0.002 mmol/L per one fetal GS unit               | -0.002-0.007 mmol/L per one fetal GS unit    | 0.25                   | -0.001                            |

CI, confidence interval; EFSOCH, Exeter Family Study of Childhood Health; FPG; fasting plasma glucose; GS, genetic score for birth weight; HAPO, Hyperglycemia and Adverse Pregnancy Outcome Study

SUPPLEMENTARY DATA

**Supplementary Table 5. Associations between maternal FPG, fetal genetic score for birth weight and corrected birth weight for participants of Thai ancestry in HAPO.** Range of maternal FPG for each tertile; lowest 3.2-4.3 mmol/L, middle 4.3-4.6 mmol/L, highest 4.7-5.7 mmol/L.

| Thai ancestry (n=1,168)                                       | Beta coefficient ( $\beta$ )             | 95% CI                                      | <i>P</i> value         | Adjusted R <sup>2</sup> |
|---------------------------------------------------------------|------------------------------------------|---------------------------------------------|------------------------|-------------------------|
| Corrected birth weight and maternal FPG as continuous measure | 191 grams per mmol/L                     | 128-253 grams per mmol/L                    | $2.3 \times 10^{-09*}$ | 0.03                    |
| Corrected birth weight and maternal FPG as ascending tertiles | 84 grams per one FPG tertile higher      | 58-111 grams per one FPG tertile higher     | $5.3 \times 10^{-10*}$ | 0.03                    |
| Corrected birth weight and fetal GS as continuous measure     | 14 grams per one fetal GS unit           | 8-20 grams per one fetal GS unit            | $5.7 \times 10^{-06*}$ | 0.02                    |
| Corrected birth weight and fetal GS as ascending tertiles     | 53 grams per one fetal GS tertile higher | 27-80 grams per one fetal GS tertile higher | $8.8 \times 10^{-05*}$ | 0.01                    |
| Maternal FPG and fetal GS as continuous measures              | -0.001 mmol/L per one fetal GS unit      | -0.007-0.004 mmol/L per one fetal GS unit   | 0.60                   | $-6.0 \times 10^{-04}$  |

\**P*<0.001

CI, confidence interval; EFSOCH, Exeter Family Study of Childhood Health; FPG; fasting plasma glucose; GS, genetic score for birth weight; HAPO, Hyperglycemia and Adverse Pregnancy Outcome Study

SUPPLEMENTARY DATA

**Supplementary Table 6. Associations between maternal FPG, fetal genetic score for birth weight and corrected birth weight for participants of Afro-Caribbean ancestry in HAPO.** Range of maternal FPG for each tertile; lowest 3.4-4.3 mmol/L, middle 4.4-4.6 mmol/L, highest 4.7-5.9 mmol/L.

| Afro-Caribbean ancestry (n=1,072)                             | Beta coefficient ( $\beta$ )             | 95% CI                                     | P value                | Adjusted R <sup>2</sup> |
|---------------------------------------------------------------|------------------------------------------|--------------------------------------------|------------------------|-------------------------|
| Corrected birth weight and maternal FPG as continuous measure | 166 grams per mmol/L                     | 97-235 grams per mmol/L                    | 2.7x10 <sup>-06*</sup> | 0.02                    |
| Corrected birth weight and maternal FPG as ascending tertiles | 77 grams per one FPG tertile higher      | 46-108 grams per one FPG tertile higher    | 1.4x10 <sup>-06*</sup> | 0.02                    |
| Corrected birth weight and fetal GS as continuous measure     | 10 grams per one fetal GS unit           | 3-17 grams per one fetal GS unit           | 0.006†                 | 0.006                   |
| Corrected birth weight and fetal GS as ascending tertiles     | 34 grams per one fetal GS tertile higher | 2-66 grams per one fetal GS tertile higher | 0.04†                  | 0.003                   |
| Maternal FPG and fetal GS as continuous measures              | -0.002 mmol/L per one fetal GS unit      | -0.005-0.01 mmol/L per one fetal GS unit   | 0.33                   | -6.2x10 <sup>-05</sup>  |

\* $P < 0.001$  † $P < 0.05$

CI, confidence interval; EFSOCH, Exeter Family Study of Childhood Health; FPG; fasting plasma glucose; GS, genetic score for birth weight; HAPO, Hyperglycemia and Adverse Pregnancy Outcome Study

SUPPLEMENTARY DATA

**Supplementary Table 7. Associations between maternal FPG, fetal genetic score for birth weight and corrected birth weight for participants of Mexican-American ancestry in HAPO.** Range of maternal FPG for each tertile; lowest 3.8-4.4 mmol/L, middle 4.5-4.8 mmol/L, highest 4.9-5.9 mmol/L.

| Mexican-American ancestry (n=602)                             | Beta coefficient ( $\beta$ )             | 95% CI                                       | <i>P</i> value         | Adjusted R <sup>2</sup> |
|---------------------------------------------------------------|------------------------------------------|----------------------------------------------|------------------------|-------------------------|
| Corrected birth weight and maternal FPG as continuous measure | 168 grams per mmol/L                     | 85-251 grams per mmol/L                      | 7.6x10 <sup>-05*</sup> | 0.02                    |
| Corrected birth weight and maternal FPG as ascending tertiles | 92 grams per one FPG tertile higher      | 52-132 grams per one FPG tertile higher      | 8.4x10 <sup>-06*</sup> | 0.03                    |
| Corrected birth weight and fetal GS as continuous measure     | 10 grams per one fetal GS unit           | 2-18 grams per one fetal GS unit             | 0.02†                  | 0.007                   |
| Corrected birth weight and fetal GS as ascending tertiles     | 69 grams per one fetal GS tertile higher | 29-109 grams per one fetal GS tertile higher | 8.4x10 <sup>-04*</sup> | 0.02                    |
| Maternal FPG and fetal GS as continuous measures              | -0.004 mmol/L per one fetal GS unit      | -0.01-0.004 mmol/L per one fetal GS unit     | 0.30                   | 1.5x10 <sup>-04</sup>   |

\**P*<0.001 †*P*<0.05

CI, confidence interval; EFSOCH, Exeter Family Study of Childhood Health; FPG; fasting plasma glucose; GS, genetic score for birth weight; HAPO, Hyperglycemia and Adverse Pregnancy Outcome Study

SUPPLEMENTARY DATA

**Supplementary Table 8. Mean and SEM for birth weight corrected for sex and gestational age in grams, in combined maternal FPG and fetal genetic score for birth weight tertiles in participants of European ancestry in EFSOCH and HAPO.** Mean birth weight for all subjects of European ancestry was  $3,448 \pm 10$  g.

| European ancestry<br>Maternal FPG<br>tertiles               | Fetal GS tertiles  |                     |                     | <i>P</i> value for<br>linear trend<br>across fetal GS<br>tertiles |
|-------------------------------------------------------------|--------------------|---------------------|---------------------|-------------------------------------------------------------------|
|                                                             | Lowest (n=679)     | Middle (n=690)      | Highest (n=682)     |                                                                   |
| Lowest (n=696)<br>Range FPG=3.2-<br>4.3 mmol/L              | 3348 (29)          | 3345 (28)           | 3462 (28)           | 0.004*                                                            |
| Middle (n=645)<br>Range FPG=4.3-<br>4.6 mmol/L              | 3413 (30)          | 3495 (28)           | 3567 (32)           | <0.001 <sup>†</sup>                                               |
| Highest (n=710)<br>Range FPG=4.6-<br>6.7 mmol/L             | 3494 (29)          | 3578 (33)           | 3727 (33)           | <0.001 <sup>†</sup>                                               |
| <i>P</i> value for trend<br>across maternal<br>FPG tertiles | 0.001 <sup>†</sup> | <0.001 <sup>†</sup> | <0.001 <sup>†</sup> |                                                                   |

\**P* <0.05, <sup>†</sup>*P* ≤0.001

EFSOCH, Exeter Family Study of Child Health; FPG, fasting plasma glucose; GS, genetic score for birth weight; HAPO, Hyperglycemia and Adverse Pregnancy Outcome Study; SEM, standard error of the mean



SUPPLEMENTARY DATA

**Supplementary Table 9. Mean and SEM for birth weight corrected for sex and gestational age in grams, in combined maternal FPG and fetal genetic score for birth weight tertiles in participants of Thai ancestry in HAPO.**

| Thai ancestry                                         | Fetal GS tertiles   |                |                     | <i>P</i> value for linear trend across GS tertiles |
|-------------------------------------------------------|---------------------|----------------|---------------------|----------------------------------------------------|
| Maternal FPG tertiles                                 | Lowest (n=386)      | Middle (n=396) | Highest (n=386)     |                                                    |
| Lowest (n=527)<br>Range FPG=3.2-4.3 mmol/L            | 2943 (28)           | 3101 (27)      | 3067 (28)           | 0.002*                                             |
| Middle (n=353)<br>Range FPG=4.4-4.6 mmol/L            | 3042 (34)           | 3132 (34)      | 3168 (33)           | 0.008*                                             |
| Highest (n=288)<br>Range FPG=4.7-5.7 mmol/L           | 3187 (37)           | 3191 (39)      | 3255 (39)           | 0.09                                               |
| <i>P</i> value for trend across maternal FPG tertiles | <0.001 <sup>†</sup> | 0.06           | <0.001 <sup>†</sup> |                                                    |

\**P*<0.05, <sup>†</sup>*P*<0.001

FPG, fasting plasma glucose; GS, genetic score for birth weight; HAPO, Hyperglycemia and Adverse Pregnancy Outcome Study; SEM, standard error of the mean

SUPPLEMENTARY DATA

**Supplementary Table 10. Mean and SEM for birth weight corrected for sex and gestational age in grams, in combined maternal FPG and fetal genetic score for birth weight tertiles in participants of Afro-Caribbean ancestry in HAPO.**

| Afro-Caribbean ancestry                               | Fetal GS tertiles |                |                 | <i>P</i> value for linear trend across GS tertiles |
|-------------------------------------------------------|-------------------|----------------|-----------------|----------------------------------------------------|
| Maternal FPG tertiles                                 | Lowest (n=354)    | Middle (n=364) | Highest (n=354) |                                                    |
| Lowest (n=452)<br>Range FPG=3.4-4.3 mmol/L            | 3048 (34)         | 3102 (34)      | 3132 (35)       | 0.07                                               |
| Middle (n=318)<br>Range FPG=4.4-4.6 mmol/L            | 3126 (43)         | 3186 (41)      | 3188 (40)       | 0.29                                               |
| Highest (n=302)<br>Range FPG=4.7-5.9 mmol/L           | 3224 (42)         | 3247 (42)      | 3275 (44)       | 0.45                                               |
| <i>P</i> value for trend across maternal FPG tertiles | 0.001*            | 0.01*          | 0.01*           |                                                    |

\**P*<0.05

FPG, fasting plasma glucose; GS, genetic score for birth weight; HAPO, Hyperglycemia and Adverse Pregnancy Outcome Study; SEM, standard error of the mean

SUPPLEMENTARY DATA

**Supplementary Table 11. Mean and SEM for birth weight corrected for sex and gestational age in grams, in combined maternal FPG and fetal genetic score tertiles in subjects of Mexican-American ancestry in HAPO.**

| Mexican-American ancestry                             | Fetal GS tertiles     |                |                | <i>P</i> value for linear trend across GS tertiles |
|-------------------------------------------------------|-----------------------|----------------|----------------|----------------------------------------------------|
|                                                       | Maternal FPG tertiles | Lowest (n=199) | Middle (n=204) |                                                    |
| Lowest (n=216)<br>Range FPG =3.8-4.4 mmol/L           | 3366 (47)             | 3392 (44)      | 3492 (49)      | 0.05                                               |
| Middle (n=205)<br>Range FPG =4.5-4.8 mmol/L           | 3409 (48)             | 3396 (51)      | 3554 (44)      | 0.03*                                              |
| Highest (n=181)<br>Range FPG=4.9-5.9 mmol/L           | 3528 (51)             | 3600 (51)      | 3685 (55)      | 0.05                                               |
| <i>P</i> value for trend across maternal FPG tertiles | 0.02*                 | 0.003*         | 0.02*          |                                                    |

\**P*<0.05

FPG, fasting plasma glucose; GS, genetic score for birth weight; HAPO, Hyperglycemia and Adverse Pregnancy Outcome Study; SEM, standard error of the mean

SUPPLEMENTARY DATA

**Supplementary Table 12. Contingency table for participants of European ancestry showing the number and % of LGA in combined maternal FPG and fetal genetic score for birth weight tertiles, and odds ratios for LGA in the highest genetic score tertile relative to the lowest genetic score tertile, and highest FPG tertile relative to the lowest FPG tertile**

|                                                                  | Fetal GS tertiles   |                      |                      | OR for LGA<br>highest vs lowest<br>GS tertile (95%<br>CI) |
|------------------------------------------------------------------|---------------------|----------------------|----------------------|-----------------------------------------------------------|
| Maternal FPG<br>tertiles                                         | Lowest<br>(n=679)   | Middle<br>(n=690)    | Highest<br>(n=682)   |                                                           |
| <b>Lowest</b><br>(n=696) Range FPG<br>= 3.2-4.3 mmol/L           | 19/230<br>(8.3%)    | 13/233<br>(5.6%)     | 31/233<br>(13.3%)    | 1.70 (0.93-3.11)                                          |
| <b>Middle</b><br>(n=645) Range FPG<br>= 4.3-4.6 mmol/L           | 13/228<br>(5.7%)    | 31/219<br>(14.2%)    | 36/198<br>(18.1%)    | 3.68 (1.89-7.15)*                                         |
| <b>Highest</b><br>(n=710) Range FPG<br>= 4.6-6.7 mmol/L          | 31/221<br>(14.0%)   | 45/238<br>(18.9%)    | 78/251<br>(31.1%)    | 2.76 (1.74-4.40)*                                         |
| <b>OR for LGA highest<br/>vs lowest FPG tertile<br/>(95% CI)</b> | 1.81<br>(0.99-3.31) | 3.95<br>(2.07-7.53)* | 2.94<br>(1.85-4.67)* |                                                           |

\**P* value <0.001

CI, confidence interval; EFSOCH, Exeter Family Study of Childhood Health; FPG, fasting plasma glucose; GS, genetic score for birth weight; HAPO, Hyperglycemia and Adverse Pregnancy Outcome Study; LGA, large for gestational age; OR, odds ratio

SUPPLEMENTARY DATA

**Supplementary Table 13. Contingency table for participants of Thai ancestry in HAPO showing the number and % of LGA in combined maternal FPG and fetal genetic score for birth weight tertiles, and odds ratios for LGA in the highest genetic score tertile relative to the lowest genetic score tertile, and highest FPG tertile relative to the lowest FPG tertile.**

| Thai ancestry                                            | Fetal GS tertiles |                  |                  | OR for LGA highest vs lowest GS tertile (95% CI) |
|----------------------------------------------------------|-------------------|------------------|------------------|--------------------------------------------------|
|                                                          | Lowest (n=386)    | Middle (n=396)   | Highest (n=386)  |                                                  |
| <b>Maternal FPG tertiles</b>                             |                   |                  |                  |                                                  |
| <b>Lowest (n=527) Range FPG=3.2-4.3 mmol/L</b>           | 5/170 (2.9%)      | 17/187 (9.1%)    | 13/180 (7.2%)    | 2.57 (0.90-7.37)                                 |
| <b>Middle (n=353) Range FPG=4.4-4.6 mmol/L</b>           | 6/113 (5.3%)      | 9/116 (7.8%)     | 10/124 (8.1%)    | 1.56 (0.55-4.45)                                 |
| <b>Highest (n=288) Range FPG=4.7-5.7 mmol/L</b>          | 9/103 (8.7%)      | 9/93 (9.7%)      | 12/92 (13.0%)    | 1.57 (0.63-3.91)                                 |
| <b>OR for LGA highest vs lowest FPG tertile (95% CI)</b> | 3.16 (1.03-9.70)* | 1.07 (0.46-2.50) | 1.93 (0.84-4.41) |                                                  |

\**P* < 0.05

CI, confidence interval; FPG, fasting plasma glucose; GS, genetic score for birth weight; HAPO, Hyperglycemia and Pregnancy Outcome Study; LGA, large for gestational age; OR, odds ratio

SUPPLEMENTARY DATA

**Supplementary Table 14. Contingency table for participants of Afro-Caribbean ancestry in HAPO showing the number and % of LGA in combined maternal FPG and fetal genetic score for birth weight tertiles, and odds ratios for LGA in the highest genetic score tertile relative to the lowest genetic score tertile, and highest FPG tertile relative to the lowest FPG tertile.**

| Afro-Caribbean ancestry                                  | Fetal GS tertiles |                  |                  | OR for LGA highest vs lowest GS tertile (95% CI) |
|----------------------------------------------------------|-------------------|------------------|------------------|--------------------------------------------------|
| Maternal FPG tertiles                                    | Lowest (n=354)    | Middle (n=364)   | Highest (n=354)  |                                                  |
| <b>Lowest (n=452) Range FPG=3.4-4.3 mmol/L</b>           | 7/153 (4.6%)      | 9/153 (5.9%)     | 13/146 (8.9%)    | 2.04 (0.79-5.26)                                 |
| <b>Middle (n=318) Range FPG=4.4-4.6 mmol/L</b>           | 4/98 (4.1%)       | 12/107 (11.2%)   | 9/113 (8.0%)     | 2.03 (0.61-6.82)                                 |
| <b>Highest (n=302) Range FPG=4.7-5.9 mmol/L</b>          | 13/103 (12.6%)    | 11/104 (10.6%)   | 13/95 (13.7%)    | 1.10 (0.48-2.50)                                 |
| <b>OR for LGA highest vs lowest FPG tertile (95% CI)</b> | 3.01 (1.16-7.83)* | 1.89 (0.76-4.74) | 0.62 (0.27-1.39) |                                                  |

\* $P < 0.05$

CI, confidence interval; FPG, fasting plasma glucose; GS, genetic score for birth weight; HAPO, Hyperglycemia and Pregnancy Outcome Study; LGA, large for gestational age; OR, odds ratio

SUPPLEMENTARY DATA

**Supplementary Table 15. Contingency table for participants of Mexican-American ancestry in HAPO showing the number and % of LGA in combined maternal FPG and fetal genetic score for birth weight tertiles, and odds ratios for LGA in the highest fetal genetic score tertile relative to the lowest fetal genetic score tertile, and highest FPG tertile relative to the lowest FPG tertile.**

| Mexican-American ancestry tertiles                       | Fetal GS          |                   |                  | OR for LGA highest vs lowest GS tertile (95% CI) |
|----------------------------------------------------------|-------------------|-------------------|------------------|--------------------------------------------------|
|                                                          | Lowest (n=199)    | Middle (n=204)    | Highest (n=199)  |                                                  |
| <b>Maternal FPG tertiles</b>                             |                   |                   |                  |                                                  |
| <b>Lowest (n=216) Range FPG=3.8-4.4 mmol/L</b>           | 3/70 (4.3%)       | 6/81 (7.4%)       | 7/65 (10.8%)     | 2.70 (0.67-10.90)                                |
| <b>Middle (n=205) Range FPG=4.5-4.8 mmol/L</b>           | 4/66 (6.1%)       | 7/59 (11.9%)      | 13/80 (16.3%)    | 3.00 (0.93-9.72)                                 |
| <b>Highest (n=181) Range FPG=4.9-5.9 mmol/L</b>          | 9/63 (14.3%)      | 15/64 (23.4%)     | 13/54 (24.1%)    | 1.90 (0.74-4.88)                                 |
| <b>OR for LGA highest vs lowest FPG tertile (95% CI)</b> | 3.72 (0.96-14.43) | 3.47 (1.27-9.53)* | 2.62 (0.96-7.16) |                                                  |

\* $P < 0.05$

CI, confidence interval; FPG, fasting plasma glucose; GS, genetic score for birth weight; HAPO, Hyperglycemia and Pregnancy Outcome Study; LGA, large for gestational age; OR, odds ratio

**Supplementary Table 16. Frequency of LGA by fetal genetic score for birth weight tertile in mothers with FPG  $\geq 5.1$  mmol/L. Odds ratio for LGA is relative to the lowest fetal genetic score for birth weight tertile.**

| Fetal GS tertiles        | LGA, n (%) | OR for LGA | 95% CI    | P value |
|--------------------------|------------|------------|-----------|---------|
| <b>Lowest GS (n=47)</b>  | 10 (21.3%) | 1.00       |           |         |
| <b>Middle GS (n=61)</b>  | 18 (29.5%) | 1.55       | 0.64-3.77 | 0.96    |
| <b>Highest GS (n=54)</b> | 23 (42.6%) | 2.75       | 1.14-6.64 | 0.02*   |

\* $P < 0.05$

CI, confidence interval; EFSOCH, Exeter Family Study for Childhood Health; FPG, fasting plasma glucose; GS, genetic score for birth weight; HAPO, Hyperglycemia and Adverse Pregnancy Outcome Study; LGA, large for gestational age; OR, odds ratio

SUPPLEMENTARY DATA

**Supplementary Table 17. The effect of fetal genetic score for birth weight on LGA in Thai, Afro-Caribbean and Mexican-American mothers in HAPO with a FPG  $\geq$ 5.1 mmol/L. Odds ratio for LGA is relative to the lowest fetal genetic score for birth weight tertile.**

| Thai ancestry             |            |            |           |                |
|---------------------------|------------|------------|-----------|----------------|
| Fetal GS tertiles         | LGA, n (%) | OR for LGA | 95% CI    | <i>P</i> value |
| Lowest GS (n=20)          | 5 (25.0%)  | 1.00       |           |                |
| Middle GS (n=13)          | 5 (38.5%)  | 1.88       | 0.42-8.47 | 0.41           |
| Highest GS (n=16)         | 2 (12.5%)  | 0.43       | 0.07-2.58 | 0.35           |
| Afro-Caribbean ancestry   |            |            |           |                |
| Fetal GS tertiles         | LGA, n (%) | OR for LGA | 95% CI    | <i>P</i> value |
| Lowest GS (n=23)          | 4 (17.4%)  | 1.00       |           |                |
| Middle GS (n=25)          | 3 (12.0%)  | 0.65       | 0.13-3.27 | 0.60           |
| Highest GS (n=21)         | 5 (23.8%)  | 1.48       | 0.34-6.48 | 0.60           |
| Mexican-American ancestry |            |            |           |                |
| Fetal GS tertiles         | LGA, n (%) | OR for LGA | 95% CI    | <i>P</i> value |
| Lowest GS (n=37)          | 5 (13.5%)  | 1.00       |           |                |
| Middle GS (n=34)          | 5 (14.7%)  | 1.10       | 0.29-4.20 | 0.89           |
| Highest GS (n=27)         | 8 (29.6%)  | 2.69       | 0.77-9.44 | 0.12           |

CI, confidence interval; FPG, fasting plasma glucose; GS, genetic score for birth weight; HAPO, Hyperglycemia and Pregnancy Outcomes; LGA, large for gestational age; OR, odds ratio



SUPPLEMENTARY DATA

**Supplementary Table 18. Associations of maternal glucose and fetal genetic score for birth weight with birth weight and skin fold thickness in EFSOCH and HAPO.** Birth weight and skin fold thickness have been converted into Z-scores (standard deviation units) to enable comparison. Data is for participants of European ancestry.

| <b>Exposure trait</b>              | <b>Outcome</b>      | <b>Effect (standard deviation [SD] change per 1 tertile higher exposure trait)</b> | <b>95% CI</b> | <b>P value</b> |
|------------------------------------|---------------------|------------------------------------------------------------------------------------|---------------|----------------|
| <b>Glucose tertiles (n=2,051)</b>  | Birth weight        | 0.240                                                                              | 0.189-0.292   | <0.001         |
| <b>Fetal GS tertiles (n=2,051)</b> | Birth weight        | 0.188                                                                              | 0.136-0.240   | <0.001         |
| <b>Glucose tertiles (n=1,996)</b>  | Skin fold thickness | 0.274                                                                              | 0.222-0.325   | <0.001         |
| <b>Fetal GS tertiles (n=1,996)</b> | Skin fold thickness | 0.177                                                                              | 0.125-0.229   | <0.001         |

CI, confidence interval; EFSOCH, Exeter Family Study for Childhood Health; FPG, fasting plasma glucose; GS, genetic score for birth weight; HAPO, Hyperglycemia and Pregnancy Outcome

## SUPPLEMENTARY DATA

**Supplementary Figure 1.** Formula showing how a weighted genetic score (GS) is calculated. The number of alleles for each single-nucleotide polymorphism (SNP) included in the score is multiplied by its weight, or beta, and divided by a sum of all beta values multiplied by the total number of SNPs.

$$\text{Weighted GS} = \frac{\text{sum (number of alleles for each SNP (0, 1 or 2) * Beta)}}{\text{sum of Beta * total number of SNPs}}$$

## SUPPLEMENTARY DATA

**Supplementary Figure 2.** Scatter plots with linear regression lines (red line) showing associations for maternal FPG and fetal genetic score for birth weight with cord C-peptide in participants of Thai ancestry (A and B respectively, n = 1167), Afro-Caribbean ancestry (C and D respectively, n = 1071) and Mexican-American ancestry (E and F respectively, n = 602). Cord C-peptide levels  $\geq 4$   $\mu\text{g/L}$  are truncated at 4  $\mu\text{g/L}$ . CI, confidence interval; FPG, fasting plasma glucose.

### Thai ancestry

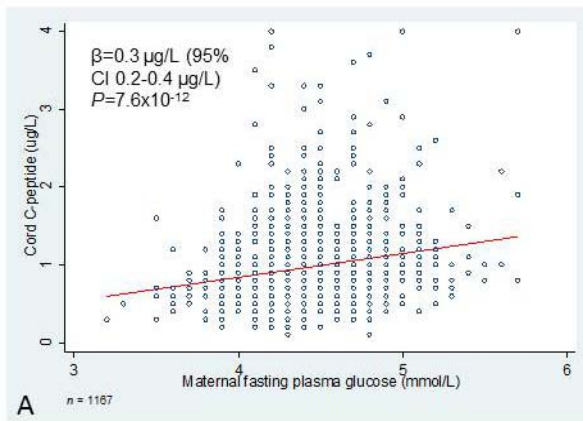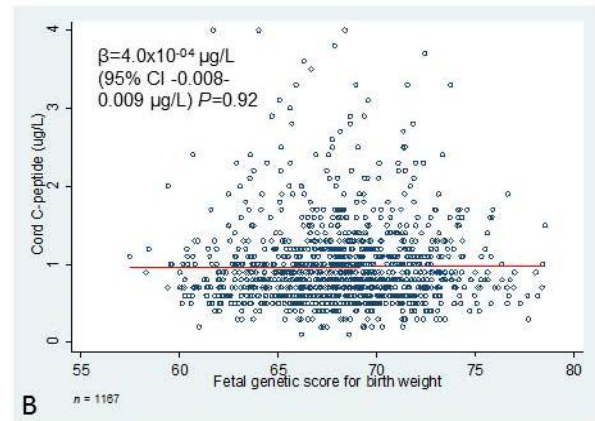

### Afro-Caribbean ancestry

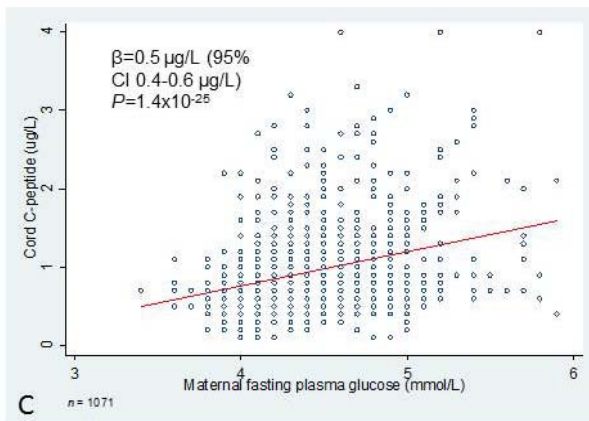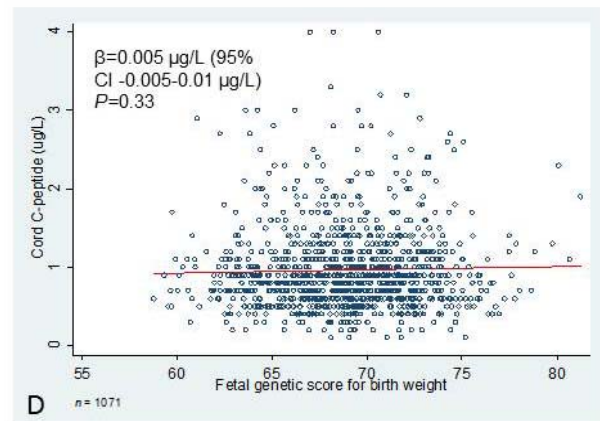

### Mexican-American ancestry

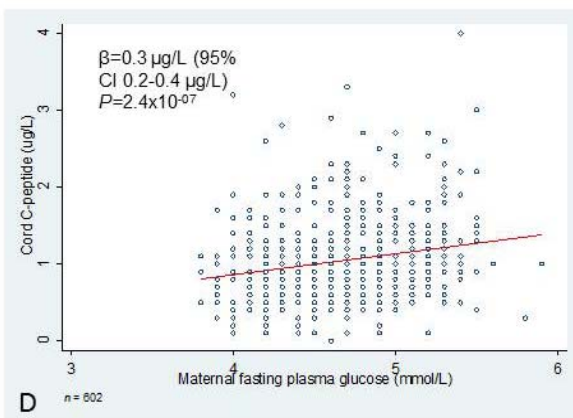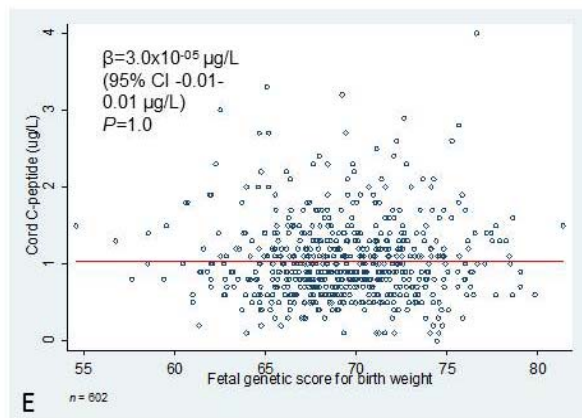

Supplement: DB171188SupplementaryData.pdf [file DB171188SupplementaryData.pdf]
